# Supplementary material for: Comparison of the Clinical Features and Outcomes of Gallbladder Neuroendocrine Carcinoma with Those of Adenocarcinoma: A Propensity Score-Matched Analysis
Source: MDPI journal article supplement (doi:10.3390/cancers13184713), 2021-09-21
Supplement: s1 [file s1]

# Supplementary Materials: Comparison of the Clinical Features and Outcomes of Gallbladder Neuroendocrine Carcinoma with Those of Adenocarcinoma: A Propensity Score-Matched Analysis

Min-Young Do, Sung-Ill Jang, Hua-Pyong Kang, Eui-Joo Kim, Kyong-Joo Lee, Go-Eun Park, Su-Jee Lee, Dong-Ki Lee, Sang-Myung Woo and Jae-Hee Cho

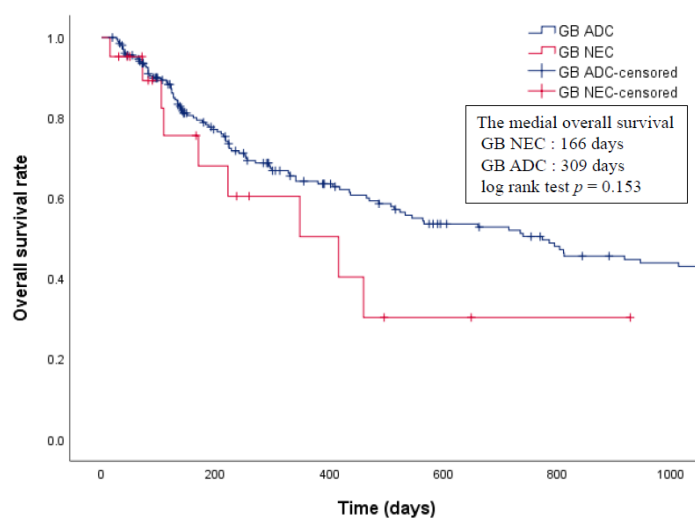

**Figure S1.** Comparison of the overall survival rate between patients with GB-NEC and GB-ADC before PS matching.

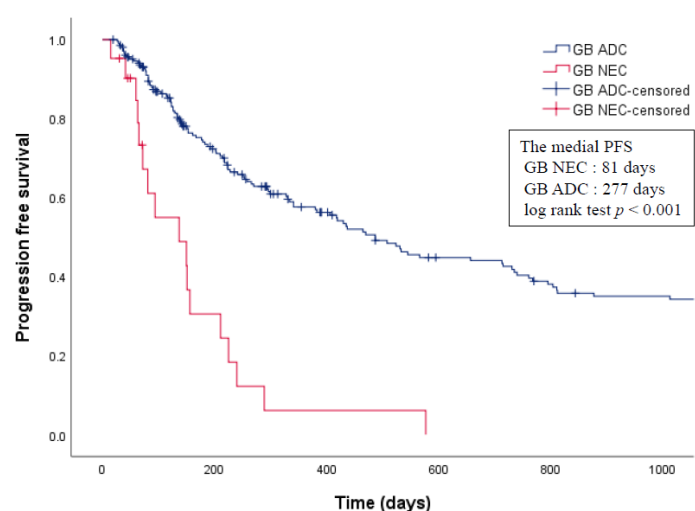

**Figure S2.** Comparison of the progression-free survival rate between GB-NEC and GB-ADC before PS matching.

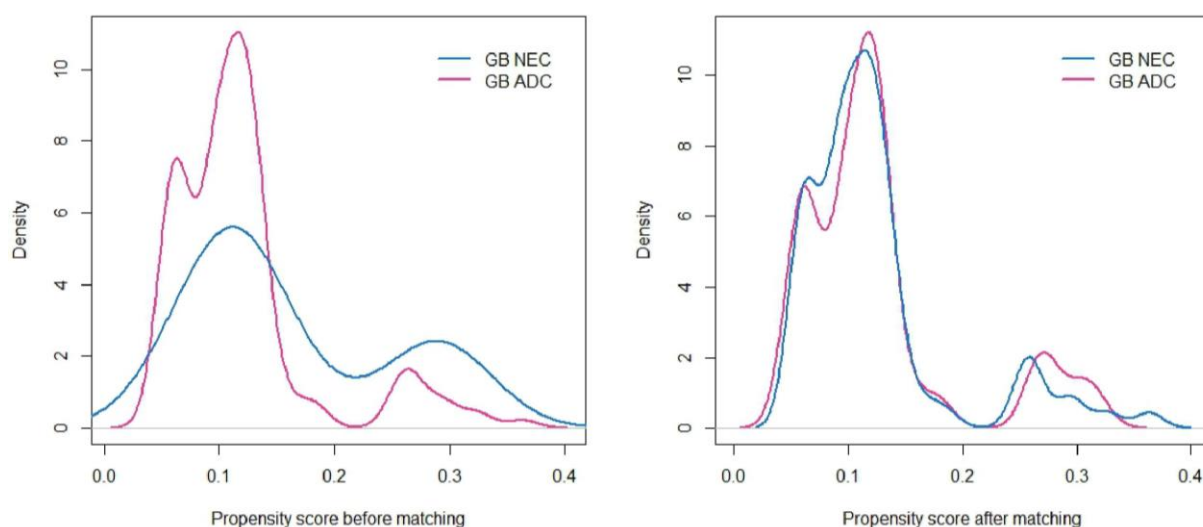

**Figure S3.** Density plot of propensity score.

**Table S1.** Gallbladder cancer staging in the 8th American Joint Committee on Cancer [15].

| Tumor      | Definition                                                                                                                                                                   |
|------------|------------------------------------------------------------------------------------------------------------------------------------------------------------------------------|
| Tis        | Carcinoma in situ                                                                                                                                                            |
| T1         | Tumor invades the lamina propria or muscular layer                                                                                                                           |
| T1a        | Invades the lamina propria                                                                                                                                                   |
| T1b        | Invades the muscle layer                                                                                                                                                     |
| T2         | Invades the perimuscular connective tissue                                                                                                                                   |
| T2a        | Invades the perimuscular connective tissue on the peritoneal side                                                                                                            |
| T2b        | Invades the perimuscular connective tissue on the hepatic side                                                                                                               |
| T3         | Perforates the serosa and/or directly invades the liver and/or other adjacent organs or structures (stomach, duodenum, colon, pancreas, omentum, or extrahepatic bile ducts) |
| T4         | Invades the main portal vein or hepatic artery or two or more extrahepatic organs or structures                                                                              |
| Node       |                                                                                                                                                                              |
| N0         | No regional lymph node metastasis                                                                                                                                            |
| N1         | Metastasis in 1–3 regional lymph nodes                                                                                                                                       |
| N2         | Metastasis in $\geq 4$ regional lymph nodes                                                                                                                                  |
| Metastasis |                                                                                                                                                                              |
| M0         | No distant metastasis                                                                                                                                                        |
| M1         | Distant metastasis present                                                                                                                                                   |
| Stage      |                                                                                                                                                                              |
| 0          | TisN0M0                                                                                                                                                                      |
| I          | T1N0M0                                                                                                                                                                       |
| IIA        | T2aN0M0                                                                                                                                                                      |
| IIB        | T2bN0M0                                                                                                                                                                      |
| IIIA       | T3N0M0                                                                                                                                                                       |
| IIIB       | T1N1M0, T2N1M0, T3N1M0                                                                                                                                                       |
| IVA        | T4N0M0, T4N1M0                                                                                                                                                               |
| IVB        | Any T, N2M0                                                                                                                                                                  |
|            | Any T, Any N, M1                                                                                                                                                             |

**Table S2.** Summary of clinical characteristics of the patients with gallbladder neuroendocrine carcinoma.

| No. | Age (Year) | Sex | Symptoms                       | Size (mm) | TNM Grade | Distant Metastasis            | WHO Classification        | Ki-67 (%)                           | IHC | Operation                                           | Operation Purpose | Chemo-Therapy Regimen | PFS (Day) | Overall Survival (Day) |
|-----|------------|-----|--------------------------------|-----------|-----------|-------------------------------|---------------------------|-------------------------------------|-----|-----------------------------------------------------|-------------------|-----------------------|-----------|------------------------|
| 1   | 74         | F   | Abdominal pain, jaundice       | NA        | IVA       |                               | NEC, small cell type > 20 | CgA (+), Syn (+), CD56 (+)          |     |                                                     |                   | EP                    | 81        | 259                    |
| 2   | 45         | M   | Jaundice                       | 78        | IVB       | Liver                         | NEC, small cell type > 20 | CgA (+), Syn (+)                    |     | Extended cholecystectomy with Rt. Hepatectomy       | Curative          | EP                    | 211       | 496                    |
| 3   | 74         | F   | Abdominal pain, abdominal mass | 20        | IIIB      |                               | NEC, large cell type > 20 | CgA (+), Syn (+), NSE (+), CD56 (+) |     | Laparoscopic cholecystectomy                        | Palliative        |                       | 72        | 72                     |
| 4   | 59         | M   | Abdominal pain                 | NA        | IVB       | Liver                         | NEC, small cell type > 20 | CgA (+), Syn (+)                    |     |                                                     |                   | EP                    | 30        | 30                     |
| 5   | 48         | F   | Abdominal pain, weight loss    | NA        | IVB       | Liver                         | NEC, small cell type NA   | CgA (−), Syn (−), CD56 (+)          |     |                                                     |                   | EP                    | 63        | 166                    |
| 6   | 62         | M   | Abdominal pain                 | 40        | IIIB      |                               | NEC, small cell type > 20 | CgA (+), Syn (+)                    |     | Radical cholecystectomy                             | Curative          | EP                    | 289       | 416                    |
| 7   | 79         | F   | Abdominal pain                 | 50        | IVB       | Liver                         | NEC, small cell type > 20 | CgA (+), Syn (+)                    |     | Extended cholecystectomy and Lt. hepatectomy        | Curative          |                       | 577       | 928                    |
| 8   | 57         | F   | Abdominal pain                 | 32        | IIIB      |                               | NEC, small cell type > 20 | CgA (+), Syn (+)                    |     | Radical cholecystectomy                             | Curative          | EP                    | 150       | 649                    |
| 9   | 84         | F   | Abdominal pain                 | 24        | IVB       | Lt supraclavicular lymph node | NEC, small cell type > 20 | CgA (+), Syn (+)                    |     |                                                     |                   |                       | 60        | 89                     |
| 10  | 60         | M   | Abdominal pain                 | 35        | IIIB      |                               | NEC, small cell type NA   | CgA (−), Syn (−)                    |     | Extended cholecystectomy and S4b/S5 bisegmentectomy | Curative          | EP                    | 151       | 222                    |
| 11  | 31         | F   | Abdominal pain                 | 50        | IVB       | Peritoneum                    | NEC, small cell type > 20 | CgA (+), Syn (+)                    |     | Laparoscopic cholecystectomy                        | Palliative        | EP                    | 94        | 105                    |

|    |    |   |                                       |     |      |                                |                           |                            |                                                  |          |    |     |     |
|----|----|---|---------------------------------------|-----|------|--------------------------------|---------------------------|----------------------------|--------------------------------------------------|----------|----|-----|-----|
| 12 | 78 | M | Health check-up                       | 40  | IIIB |                                | NEC, small cell type > 20 | CgA (+), Syn (+)           | Extended cholecystectomy and liver segmentectomy | Curative | EP | 240 | 460 |
| 13 | 75 | M | Health check-up                       | 38  | IIIB |                                | NEC, small cell type > 20 | CgA (+), Syn (+)           | Radical cholecystectomy                          | Curative | EP | 225 | 237 |
| 14 | 68 | M | Abdominal pain, jaundice, weight loss | 140 | IVB  | Liver                          | NEC, small cell type > 20 | CgA (+), Syn (+)           |                                                  |          |    | 45  | 45  |
| 15 | 82 | M | Abdominal pain, weight loss           | 47  | IVB  |                                | NEC, small cell type NA   | CgA (−), Syn (+)           |                                                  |          |    | 137 | 170 |
| 16 | 44 | M | Abdominal pain, abdominal mass        | 43  | IVB  | Liver                          | NEC, small cell type > 20 | CgA (+), Syn (+), CD56 (+) |                                                  |          | EP | 65  | 109 |
| 17 | 66 | M | Abdominal pain, jaundice              | 180 | IVB  | Liver                          | NEC, small cell type > 20 | CgA (+), Syn (+), CD56 (+) |                                                  |          |    | 15  | 15  |
| 18 | 57 | F | Abdominal pain, jaundice, weight loss | 59  | IVB  | Liver                          | NEC, small cell type NA   | CgA (−), Syn (+), CD56 (+) |                                                  |          | GP | 50  | 50  |
| 19 | 62 | M | Abdominal pain                        | 66  | IVB  | Liver                          | NEC, small cell type > 20 | CgA (+), Syn (−), CD56 (+) |                                                  |          | GP | 41  | 82  |
| 20 | 61 | F | Abdominal pain, jaundice, pruritus    | 35  | IVB  | Liver                          | NEC, small cell type > 20 | CgA (+), Syn (+), CD56 (+) |                                                  |          | GP | 156 | 348 |
| 21 | 83 | F | Abdominal pain, back pain             | 40  | IVB  | Liver, Rt. Ovary, L5 vertebral | NEC, small cell type > 20 | CgA (+), Syn (+), CD56 (+) |                                                  |          |    | 71  | 71  |

CgA, chromogranin A; EP, Etoposide + Cisplatin; F, female; GP, Gemcitabine + Cisplatin; IHC, immunohistochemistry; M, male; NA, not available; NEC, neuroendocrine carcinoma; PFS, progression free survival; Syn, synaptophysin; TMN, tumor node metastasis; WHO, World Health Organization.

**Table S3.** Clinical features, treatments and outcomes of 206 patients with gallbladder adenocarcinoma.

| Variables                                  | Mean (SD) or <i>n</i> (%) |
|--------------------------------------------|---------------------------|
| Age, years, mean (SD)                      | 65.00 ± 11.1              |
| Sex, <i>n</i> (%)                          |                           |
| Male                                       | 91 (44.2)                 |
| Female                                     | 115 (55.8)                |
| Tumor marker, mean (SD)                    |                           |
| CA19-9 (U/mL)                              | 1924.9 ± 4620.9           |
| CEA (ng/mL)                                | 48.0 ± 237.1              |
| Differentiated degree, <i>n</i> (%)        |                           |
| Well differentiated                        | 29 (14.1)                 |
| Moderate differentiated                    | 71 (34.5)                 |
| Poorly differentiated                      | 38 (18.4)                 |
| Unknown                                    | 68 (33.0)                 |
| TNM stage, <i>n</i> (%)                    |                           |
| I                                          | 17 (8.3)                  |
| IIA                                        | 32 (15.5)                 |
| IIB                                        | 10 (4.9)                  |
| IIIB                                       | 15 (7.3)                  |
| IVA                                        | 6 (2.9)                   |
| IVB                                        | 126 (61.2)                |
| Distant metastasis, <i>n</i> (%)           |                           |
| Liver                                      | 93 (45.1)                 |
| Lung                                       | 14 (6.8)                  |
| Peritoneum                                 | 42 (20.4)                 |
| Operation, <i>n</i> (%)                    | 115 (55.8)                |
| Laparoscopic cholecystectomy               | 40                        |
| Radical cholecystectomy                    | 75                        |
| Chemotherapy, <i>n</i> (%)                 | 141 (68.4)                |
| Progression free survival, days, mean (SD) | 710.3 ± 1010.0            |
| Overall Survival, days, mean (SD)          | 796.4 ± 1061.9            |

CA19-9, carbohydrate antigen 19-9; CEA, carcinoembryonic antigen; SD, standard deviation; TMN, tumor node metastasis.
